# Supplementary material
Source: HighWire-hosted journal article supplement (https://bmjpaedsopen.bmj.com/content/suppl/2023/12/19/10.1136.bmjpo-2023-002269)
Supplement: bmjpo-2023-002269supp002_data_supplement.pdf [file bmjpo-2023-002269supp002_data_supplement.pdf]

## Supplementary Material 2

### Proposed Timeline

| <b>Study Timeline (2023-2024)</b> |                              |
|-----------------------------------|------------------------------|
| Protocol Approval                 | November 2023                |
| Literature Search and Screening   | November – December 2023     |
| Data Extraction                   | December 2023 – January 2024 |
| Quality Appraisal                 | February 2024                |
| Synthesis and Analyses            | March – May 2024             |
| Writing Up                        | June – August 2024           |
